# Supplementary material for: Case-Control Study of Nodding Syndrome in Acholiland: Urinary Multi-Mycotoxin Screening
Source: Toxins (Basel). 2021 Apr 27;13(5):313. doi: 10.3390/toxins13050313 (PMC8145943; doi:10.3390/toxins13050313)
Supplement: Supplementary file 1 [file toxins-13-00313-s001.zip › toxins-1165115-supplementary DOI.pdf]

# Supplementary Materials: Case-Control Study of Nodding Syndrome in Acholiland: Uri-nary Multi-Mycotoxin Screening

Jennifer Durringer, Rajarshi Mazumder, Valerie Palmer, A. Morrie Craig and Peter Spencer \*

Table S1. Validation data

| Compound         | Linearity | Calibration curve range | LOD (ng/mL) | LOQ (ng/mL) |
|------------------|-----------|-------------------------|-------------|-------------|
| Alpha-zearalenol | 0.995     | 5–500 ng/mL             | 5           | 20          |
| Beta-zearalenol  | 0.995     | 20–500 ng/mL            | 20          | 20          |
| Aflatoxin M1     | 0.995     | 1–50 ng/mL              | 1           | 5           |
| Fumonisin B1     | 0.996     | 0.1–50 ng/mL            | 0.1         | 2.5         |
| Fumonisin B2     | 0.993     | 0.5–50 ng/mL            | 0.5         | 2.5         |
| HT-2 toxin       | 0.893     | 0.2–5 ng/mL             | 0.2         | 5           |
| Ochratoxin A     | 0.990     | 0.5–100 ng/mL           | 0.5         | 0.5         |
| T-2 toxin        | 0.967     | 1–20 ng/mL              | 1           | 10          |
| Zearalenone      | 0.997     | 10–500 ng/mL            | 10          | 10          |

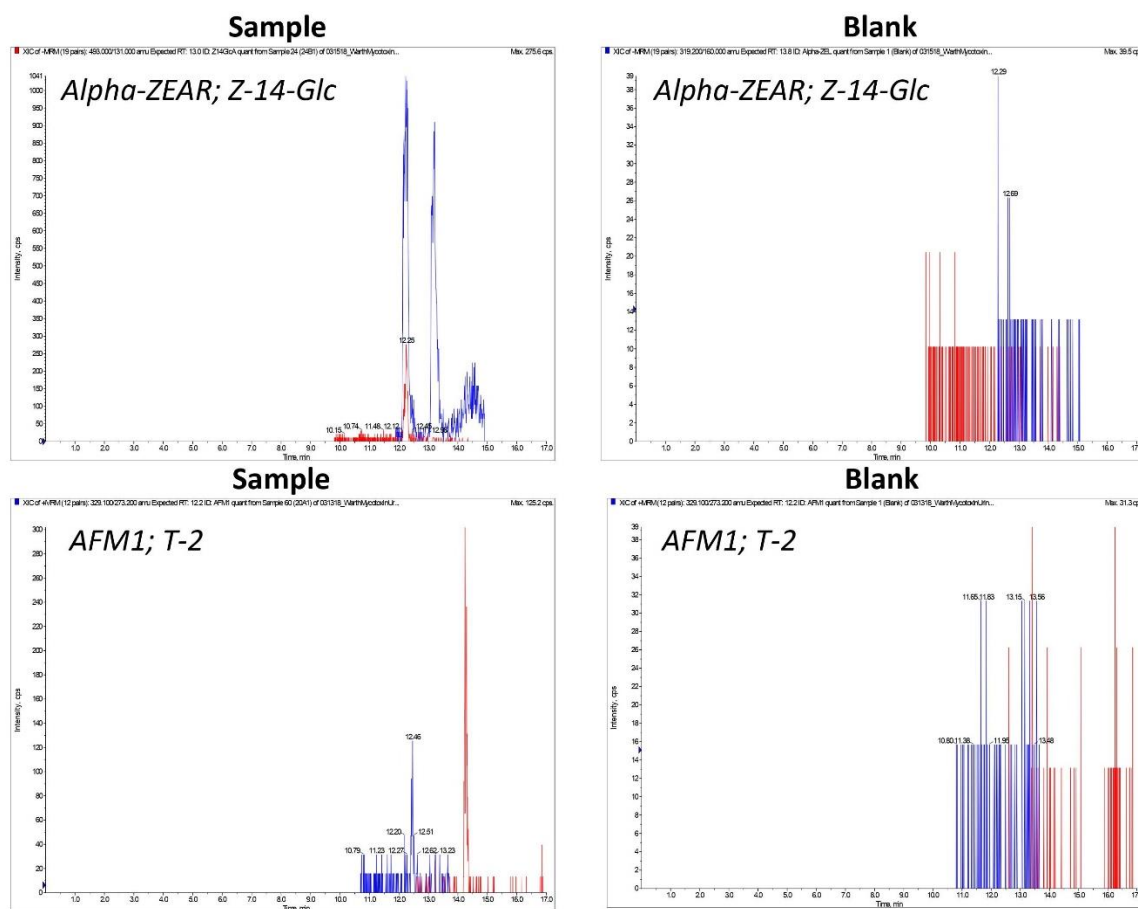

**Figure S1.** Extracted ion chromatograms of mycotoxins detected in urine of Acholi children, as compared to method blank (1:9 ACN:water).
